the ASA score is related to its simplicity. The ASA score has penetrated beyond anesthesia and even beyond human medicine.<sup>4</sup> It may even be considered on a par with the Apgar score.<sup>5</sup>

We hesitate to support the authors' recommendation to use the examples to the ASA score, instead of using common sense and simple rules. Having a list of examples transforms a simple albeit subjective universal score into a cumbersome one. Keep it simple, stupid (KISS).<sup>6</sup>

### Competing Interests

The authors declare no competing interests.

**Alexander Avidan, M.D., Carolyn F. Weiniger, M.B., Ch.B.** Hadassah – Hebrew University Medical Center, Jerusalem, Israel (A.A.). alex@avidan.co.il

### References

1. Hurwitz EE, Simon M, Vinta SR, Zehm CF, Shabot SM, Minhajuddin A, Abouleish AE: Adding examples to the ASA-Physical Status Classification improves correct assignment to patients. *ANESTHESIOLOGY* 2017; 126:614–22
2. ASA Physical Status Classification System. Available at: <https://www.asahq.org/resources/clinical-information/asa-physical-status-classification-system>. Accessed March 14, 2017
3. Sweitzer B: Three wise men (x2) and the ASA-Physical Status Classification System. *ANESTHESIOLOGY* 2017; 126:577–8
4. Zeltzman P: How ASA scores help make anesthesia safer for your pet patients. Available at: <http://www.veterinarypracticenews.com/how-asa-scores-help-make-anesthesia-safer-for-your-pet-patients/>. Accessed March 14, 2017
5. Apgar V: A proposal for a new method of evaluation of the newborn infant. *Curr Res Anesth Analg* 1953; 32:260–7
6. Kiss principle. Available at: [https://en.wikipedia.org/wiki/KISS\\_principle](https://en.wikipedia.org/wiki/KISS_principle). Accessed March 14, 2017

(Accepted for publication September 28, 2017.)

### In Reply:

I thank Drs. Avidan and Weiniger for their comments on my article.<sup>1</sup> Their suggestion and use of the acronym KISS (keep it simple stupid) summarizes the point of my editorial much more succinctly than my two pages. I could not agree more with them that adding nonvalidated examples to a simple, “commonsense” categorization may hobble the time-honored utility and universal use of the American Society of Anesthesiologists (ASA) Physical Status Classification System. I smiled when I saw the veterinary reference in their letter. I had originally referenced a study using the ASA classification in veterinary anesthesia but removed it due to space constraints.<sup>2</sup> Anesthesiologists need to be extremely cautious before altering a tool as far-reaching and surprisingly robust as the ASA classification in the practice of medicine, even across genera.

### Competing Interests

The author declares no competing interests.

**BobbieJean Sweitzer, M.D., F.A.C.P.,** Northwestern University, Chicago, Illinois. bobbie.sweitzer@northwestern.edu

### References

1. Sweitzer B: Three wise men (x2) and the ASA-Physical Status Classification System. *ANESTHESIOLOGY* 2017; 126:577–8
2. McMillan M, Brearley J: Assessment of the variation in American Society of Anaesthesiologists Physical Status Classification assignment in small animal anaesthesia. *Vet Anaesth Analg* 2013; 40:229–36

(Accepted for publication September 28, 2017.)

### In Reply:

We thank Drs. Avidan and Weiniger for their comments related to our article, “Adding Examples to the ASA-Physical Status Classification Improves Correct Assignment to Patients.”<sup>1</sup> They posit that the addition of objective examples to the previously subjective American Society of Anesthesiologists Physical Status (ASA-PS) Classification System may hinder the universal application of the ASA-PS score by unnecessarily increasing the complexity of the system.

As stated in their letter, “the ASA score has penetrated beyond anesthesia.” It is our belief that this is exactly why the examples *should* be used. With the increasing use of the ASA-PS score by nonanesthesia providers, there are many assigning ASA-PS who do not have the anesthesia-related training to understand the differences between classifications. Although we agree that physician anesthesiologists currently use “common sense” in determining the ASA-PS, the gestalt that many of us have in applying the ASA-PS in practice may not exist for those who do not have experience in anesthesiology. Additionally, poor interrater reliability for the ASA-PS has been shown repeatedly.<sup>2–4</sup> For these reasons, the ASA-PS examples may ultimately prove more useful for nonanesthesia providers than anesthesia ones. As we demonstrated, with examples there was improvement in correct assignment for anesthesia and nonanesthesia providers with no significant difference in the rate of correct assignment between anesthesia-trained and nonanesthesia clinicians.<sup>1</sup> We reiterate that the examples are guidelines and recognize the list is not comprehensive; the examples should provide a framework indicating the most likely appropriate ASA-PS score for commonly encountered diseases. The final determination of ASA-PS should be made by a physician anesthesiologist. We recognize that until further studies are done, the true effect of these examples in clinical practice is yet to be seen. We agree that uniform application across the board, even with examples, is unlikely, but given the inconsistency that already exists with ASA-PS score assignments, it is hard to argue that an addition with the potential to improve objective scoring should not be used clinically.

## Competing Interests

The author declares no competing interests.

**Erin Hurwitz, M.D.**, Affiliated Anesthesiologists, LLC, Oklahoma City, Oklahoma. erin.hurwitz@gmail.com

## References

1. Hurwitz EE, Simon M, Vinta SR, Zehm CF, Shabot SM, Minhajuddin A, Abouleish AE: Adding examples to the ASA-Physical Status Classification improves correct assignment to patients. *ANESTHESIOLOGY* 2017; 126:614–22
2. Owens WD, Felts JA, Spitznagel EL Jr: ASA Physical Status Classifications: A study of consistency of ratings. *ANESTHESIOLOGY* 1978; 49:239–43
3. Haynes SR, Lawler PG: An assessment of the consistency of ASA physical status classification allocation. *Anaesthesia* 1995; 50:195–9
4. Sankar A, Johnson SR, Beattie WS, Tait G, Wijesundera DN: Reliability of the American Society of Anesthesiologists physical status scale in clinical practice. *Br J Anaesth* 2014; 113:424–32

(Accepted for publication September 28, 2017.)

## Use of Vasopressin in Vasoplegic Syndrome with Reduced Ejection Fraction: Asking for Trouble

*To the Editor:*

I read the article by Hajjar *et al.* with great enthusiasm.<sup>1</sup> First, I would like to congratulate the authors for their ambitious study and reasonable conclusions. They concluded that vasopressin improved clinical outcomes better than norepinephrine in vasoplegic shock after cardiac surgery. I would like to discuss the concerns associated with the use of a pure vasoconstrictor after cardiac surgery.

Transient or sustained vasoplegia is not uncommon after cardiac surgery and it is characterized by a fall in systemic vascular resistance (SVR).<sup>2</sup> In addition, myocardial stunning or hibernation after cardiac surgery commonly results in reduction of left ventricular ejection fraction.<sup>3</sup> Furthermore, preoperative low ejection fraction is one of the most documented predictors for vasoplegia after on-pump cardiac surgery.<sup>2</sup> A reduction in SVR may be associated with improvement in cardiac index.<sup>4</sup> To maintain systemic blood pressure solely by increasing SVR without augmenting cardiac contractility may prove counterproductive.<sup>5</sup> Therefore, our target should be to maintain SVR within normal limits.<sup>6</sup> Although the authors mentioned that the cardiac index did not change after vasopressor infusion, in patients with reduced ejection fraction, cardiac index expectedly reduces after pure vasoconstrictor infusion.<sup>7</sup> Vasopressin-related myocardial dysfunction does not arise as a result of increase in SVR, but from a direct effect on cardiac contractility.<sup>8</sup> In the current study, the majority of patients (53%) had a normal preoperative ejection fraction (greater than 60%). Unlike vasopressin, its receptor antagonist

has shown to improve left ventricular systolic function.<sup>9,10</sup> An assessment of ejection fraction in vasoplegic syndrome would have been ideal for better interpretation of the results of this study. In patients with preserved ejection fraction, vasopressin may prove superior to norepinephrine, but generalization of this study finding in patients with vasoplegic syndrome and diminished ejection fraction could be debatable.

## Competing Interests

The author declares no competing interests.

**Ajay Kumar Jha, M.D., D.M.**, All India Institute of Medical Sciences, Bhubaneswar, India. drajaykjh@rediffmail.com

## References

1. Hajjar LA, Vincent JL, Barbosa Gomes Galas FR, Rhodes A, Landoni G, Osawa EA, Melo RR, Sundin MR, Grande SM, Gaiotto FA, Pomerantzeff PM, Dallan LO, Franco RA, Nakamura RE, Lisboa LA, de Almeida JP, Gerent AM, Souza DH, Gaiane MA, Fukushima JT, Park CL, Zambolim C, Rocha Ferreira GS, Strabelli TM, Fernandes FL, Camara L, Zeferino S, Santos VG, Piccioni MA, Jatene FB, Costa Auler JO Jr, Filho RK: Vasopressin *versus* norepinephrine in patients with vasoplegic shock after cardiac surgery: The VANCS randomized controlled trial. *ANESTHESIOLOGY* 2017; 126:85–93
2. Argenziano M, Chen JM, Choudhri AF, Cullinane S, Garfein E, Weinberg AD, Smith CR Jr, Rose EA, Landry DW, Oz MC: Management of vasodilatory shock after cardiac surgery: Identification of predisposing factors and use of a novel pressor agent. *J Thorac Cardiovasc Surg* 1998; 116:973–80
3. Appleyard RF, Cohn LH: Myocardial stunning and reperfusion injury in cardiac surgery. *J Card Surg* 1993; 8(2 Suppl): 316–24
4. Bixler TJ, Gardner TJ, Donahoo JS, Brawley RK, Potter A, Gott VL: Improved myocardial performance in postoperative cardiac surgical patients with sodium nitroprusside. *Ann Thorac Surg* 1978; 25:444–8
5. Ertmer C, Morelli A, Bone HG, Stubbe HD, Schepers R, Van Aken H, Lange M, Bröking K, Lücke M, Traber DL, Westphal M: Dobutamine reverses the vasopressin-associated impairment in cardiac index and systemic oxygen supply in ovine endotoxemia. *Crit Care* 2006; 10:R144
6. Klinzing S, Simon M, Reinhart K, Bredle DL, Meier-Hellmann A: High-dose vasopressin is not superior to norepinephrine in septic shock. *Crit Care Med* 2003; 31:2646–50
7. Dünser MW, Hasibeder WR: Vasopressin in vasodilatory shock: Ensure organ blood flow, but take care of the heart! *Crit Care* 2006; 10:172
8. Asfar P, Radermacher P: Vasopressin and ischaemic heart disease: More than coronary vasoconstriction? *Crit Care* 2009; 13:169
9. Suzuki S, Yoshihisa A, Yamaki T, Sugimoto K, Kunii H, Nakazato K, Abe Y, Saito T, Ohwada T, Suzuki H, Saitoh S, Kubota I, Takeishi Y; AVCMA investigators: Vasopressin V2 receptor antagonist tolvaptan is effective in heart failure patients with reduced left ventricular systolic function and low blood pressure. *Int Heart J* 2015; 56:213–8
10. Yamazaki T, Izumi Y, Nakamura Y, Yamashita N, Fujiki H, Osada-Oka M, Shiota M, Hanatani A, Shimada K, Iwao H, Yoshiyama M: Tolvaptan improves left ventricular dysfunction after myocardial infarction in rats. *Circ Heart Fail* 2012; 5:794–802

(Accepted for publication September 29, 2017.)
